# Supplementary material
Source: PubMed Central journal article supplement (PMC5005452)
Supplement: mmc1.pdf [file mmc1.pdf]

**Supplemental Data**

**Mutations in *CDC45*, Encoding an Essential  
Component of the Pre-initiation Complex,  
Cause Meier-Gorlin Syndrome and Craniosynostosis**

Aimee L. Fenwick, Maciej Kliszczyk, Fay Cooper, Jennie Murray, Luis Sanchez-Pulido, Stephen R.F. Twigg, Anne Goriely, Simon J. McGowan, Kerry A. Miller, Indira B. Taylor, Clare Logan, WGS500 Consortium, Sevcan Bozdogan, Sumita Danda, Joanne Dixon, Solaf M. Elsayed, Ezzat Elsobky, Alice Gardham, Mariette J.V. Hoffer, Marije Koopmans, Donna M. McDonald-McGinn, Gijs W.E. Santen, Ravi Savarirayan, Deepthi de Silva, Olivier Vanakker, Steven A. Wall, Louise C. Wilson, Ozge Ozalp Yuregir, Elaine H. Zackai, Chris P. Ponting, Andrew P. Jackson, Andrew O.M. Wilkie, Wojciech Niedzwiedz, and Louise S. Bicknell

## **Supplementary Note.**

### **WGS500: names and affiliations of authors**

**Steering Committee:** Peter Donnelly (Chair)<sup>1</sup>, John Bell<sup>2</sup>, David Bentley<sup>3</sup>, Gil McVean<sup>1</sup>, Peter Ratcliffe<sup>1</sup>, Jenny Taylor<sup>1,4</sup>, Andrew Wilkie<sup>4,5</sup>

**Operations Committee:** Peter Donnelly (Chair)<sup>1</sup>, John Broxholme<sup>1</sup>, David Buck<sup>1</sup>, Jean-Baptiste Cazier<sup>1</sup>, Richard Cornall<sup>1</sup>, Lorna Gregory<sup>1</sup>, Julian Knight<sup>1</sup>, Gerton Lunter<sup>1</sup>, Gil McVean<sup>1</sup>, Jenny Taylor<sup>1,4</sup>, Ian Tomlinson<sup>1,4</sup>, Andrew Wilkie<sup>4,5</sup>

**Sequencing & Experimental Follow up:** David Buck (Lead)<sup>1</sup>, Christopher Allan<sup>1</sup>, Moustafa Attar<sup>1</sup>, Angie Green<sup>1</sup>, Lorna Gregory<sup>1</sup>, Sean Humphray<sup>3</sup>, Zoya Kingsbury<sup>3</sup>, Sarah Lamble<sup>1</sup>, Lorne Lonie<sup>1</sup>, Alistair Pagnamenta<sup>1</sup>, Paolo Piazza<sup>1</sup>, Guadalupe Polanco<sup>1</sup>, Amy Trebes<sup>1</sup>

**Data Analysis:** Gil McVean<sup>1</sup> (Lead), Peter Donnelly<sup>1</sup>, Jean-Baptiste Cazier<sup>1</sup>, John Broxholme<sup>1</sup>, Richard Copley<sup>1</sup>, Simon Fiddy<sup>1</sup>, Russell Grocock<sup>3</sup>, Edouard Hatton<sup>1</sup>, Chris Holmes<sup>1</sup>, Linda Hughes<sup>1</sup>, Peter Humburg<sup>1</sup>, Alexander Kanapin<sup>1</sup>, Stefano Lise<sup>1</sup>, Gerton Lunter<sup>1</sup>, Hilary Martin<sup>1</sup>, Lisa Murray<sup>3</sup>, Davis McCarthy<sup>1</sup>, Andy Rimmer<sup>1</sup>, Natasha Sahgal<sup>1</sup>, Ben Wright<sup>1</sup>, Chris Yau<sup>6</sup>

<sup>1</sup>The Wellcome Trust Centre for Human Genetics, Roosevelt Drive, Oxford, OX3 7BN, UK

<sup>2</sup>Office of the Regius Professor of Medicine, Richard Doll Building, Roosevelt Drive, Oxford, OX3 7LF, UK

<sup>3</sup>Illumina Cambridge Ltd., Chesterford Research Park, Little Chesterford, Essex, CB10 1XL, UK

<sup>4</sup>NIHR Oxford Biomedical Research Centre, Oxford, UK

<sup>5</sup>Weatherall Institute of Molecular Medicine, John Radcliffe Hospital, Headington, Oxford OX3 9DS, UK

<sup>6</sup>Imperial College London, South Kensington Campus, London, SW7 2AZ, UK

### **Note on accession numbers for *CDC45***

Human *CDC45* encodes a 20-exon gene that has been annotated as including three major spliceforms. As well as the full-length version which encodes a protein of 598 amino acids, alternative splicing to skip either exon 7 alone or both exons 4 and 7 leads to shorter isoforms with in-frame deletions of 32 and 78 amino acids, respectively. Whereas exon 4 shows high conservation in mammalian species both in sequence and occurrence of exon skipping, neither is the case for exon 7, so the physiological significance of the isoform including exon 7 is currently uncertain. Virtually all previous publications investigating the structure and function of *CDC45* employ the numbering of the middle-sized, 566 amino acid isoform, so for consistency with prior work all numbering used here refers to NM\_003504.4.

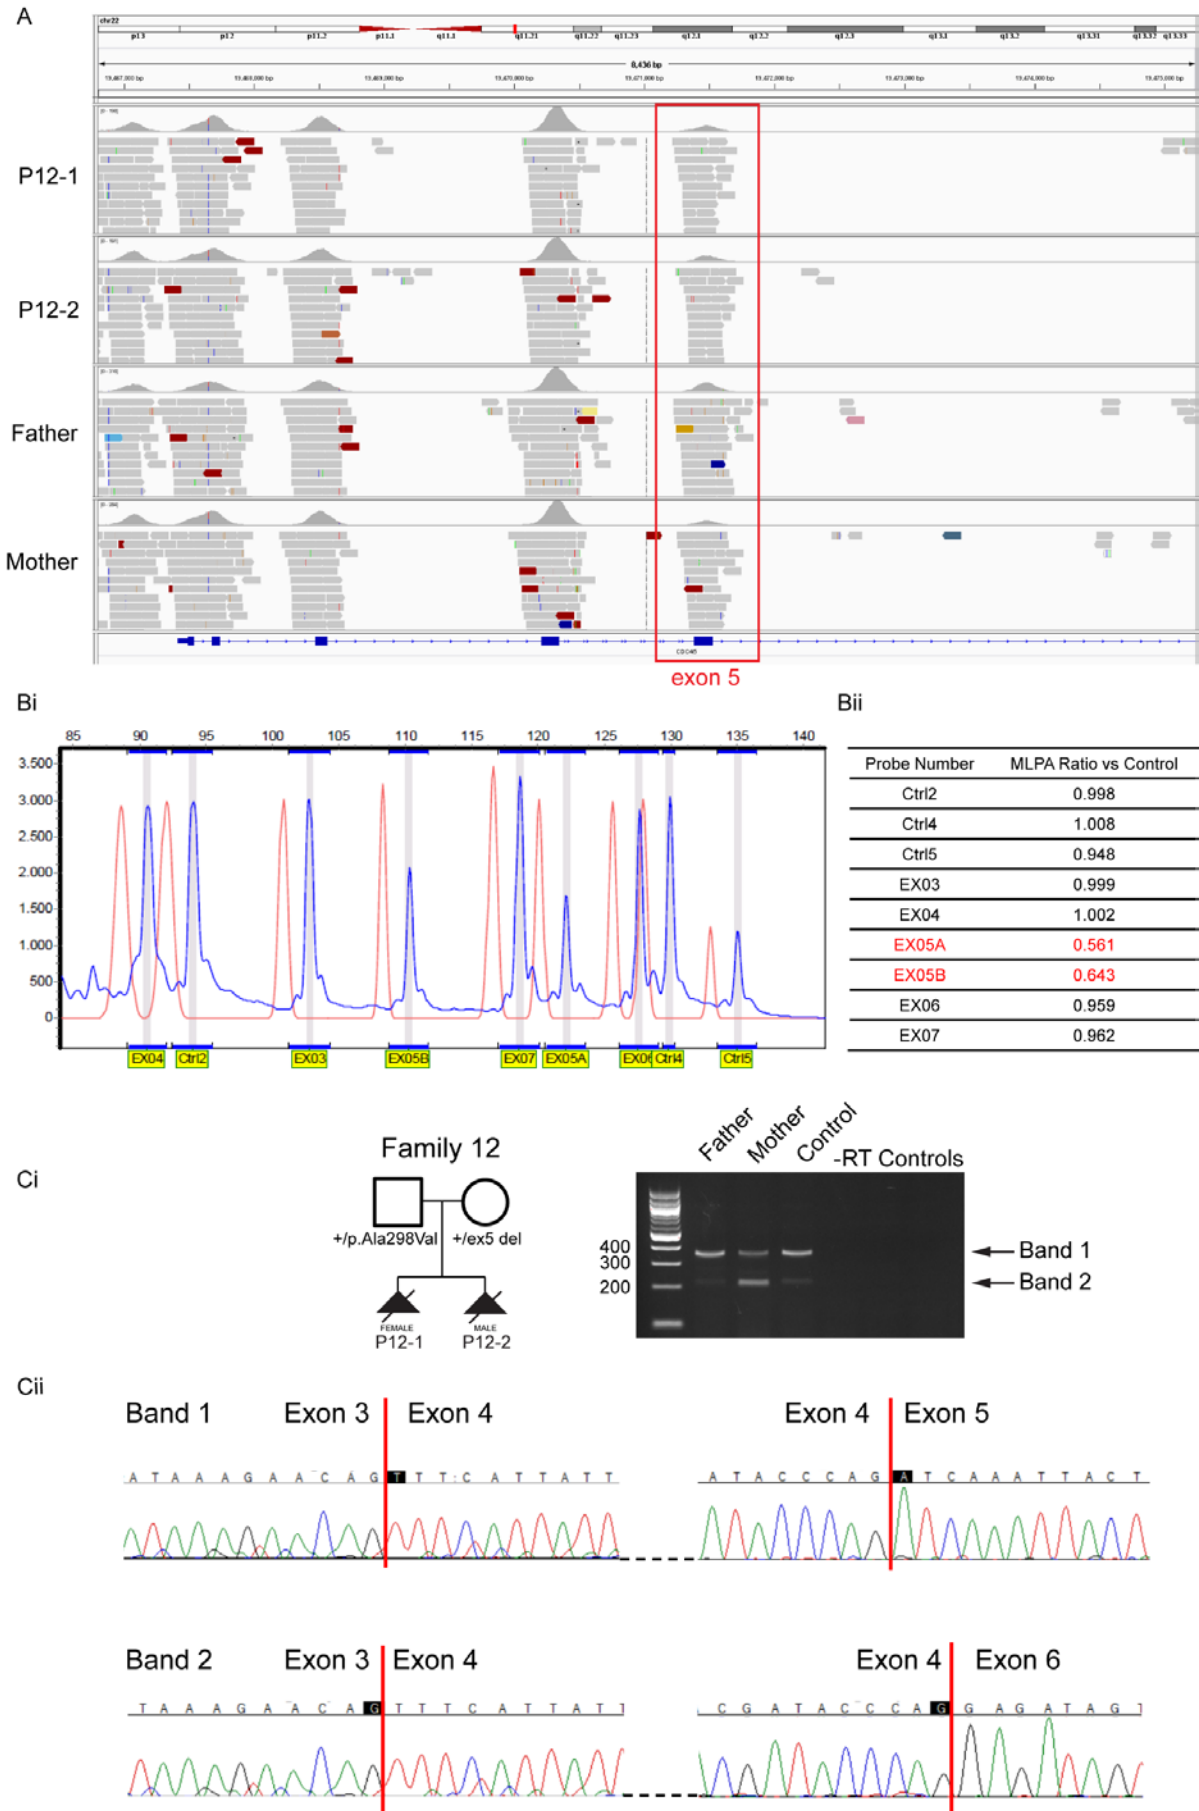

**Figure S1.** Family 12 segregates a genomic deletion encompassing exon 5 of *CDC45*.

(A) Manual interrogation of exome sequencing reads across the *CDC45* gene suggested a decrease in coverage across exon 5 in both affected samples and the carrier mother, compared to the father, who carries the c.893C>T, p.Ala298Val variant. While the reduction in coverage was not statistically significant, the presence of a rare variant on the *trans* allele in both affected samples prompted further investigation. BAM files visualized using IGV. (B) MLPA, comparing the quantity of DNA in a test sample vs a synthetic control with multiple probes across *CDC45*, was performed in both affected samples and the mother, and all samples showed a deletion of exon 5. (Bi) Peak traces of control (red) and affected (blue). (Bii) Calculated ratio of DNA. Both probes for exon 5 demonstrate an approximately 50% reduction, consistent with a heterozygous deletion of exon 5. Probes for exon 4 and exon 6 do not show a reduction, indicating the breakpoints for the deletion lie within intron 4 and intron 5, respectively. Reports generated using GeneMarker Software (SoftGenetics Inc.). (C) RT-PCR and sequencing of cDNA from carrier parents in Family 12. (Ci) RT-PCR of exons 3-6 in *CDC45* from cDNA derived from parents in Family 12. There is an increase in a lower migrating band in the mother, who carries the exon 5 deletion allele (a faint co-migrating lower band visible in all samples is caused by physiological skipping of exon 4, see figure 5). (Cii) Sequencing of each band from the maternal sample indicates the lower migrating band (labelled Band 2) comprises exons 3, 4 and 6, with complete skipping of exon 5, resulting in an in-frame transcript.

**Table S1. Experimental details for next-generation sequencing undertaken in this study.**

| Family | Clinical Diagnosis/<br>Study Focus                     | Design | Library Kit                                  | Platform           | Analysis Software                                           |                                 |                      | Coverage | Filtering parameters                                | Control populations |
|--------|--------------------------------------------------------|--------|----------------------------------------------|--------------------|-------------------------------------------------------------|---------------------------------|----------------------|----------|-----------------------------------------------------|---------------------|
|        |                                                        |        |                                              |                    | Mapping                                                     | Variant Calling                 | Annotation           |          |                                                     |                     |
| 1      | Craniosynostosis (SC_2930), clinical genome sequencing | Genome | NEBNext DNA Sample Prep Master Mix Set 1 Kit | Illumina HiSeq2000 | BWA <sup>1</sup> , Stampy (v1.0.12-1.0.22) <sup>2</sup>     | Platypus (v.0.2.4) <sup>3</sup> | ANNOVAR <sup>4</sup> | 28x      | Minor allele absent                                 | 1000 Genomes, ESP   |
| 2      | Craniosynostosis                                       | Exome  | TruSeq V2                                    | Illumina HiSeq2000 | Novoalign (Novocraft Technologies)                          | SAMtools (v0.1.19)              | ANNOVAR              | 55x      | Minor allele absent                                 | 1000 Genomes, ESP   |
| 4      | Primordial dwarfism                                    | Exome  | SureSelect V4                                | Illumina HiSeq2500 | BWA, Stampy                                                 | SAMtools, Dindel                | Ensembl VEP          | 50x      | MAF < 0.005, ≥ 1 deleterious consequence prediction | 1000 Genomes, ESP   |
| 12     | Diagnostic                                             | Exome  | SureSelect <sup>XT</sup> V5                  | Illumina HiSeq2500 | Custom in-house pipeline MAGPIE (based on BAM-MEM and GATK) |                                 |                      | 70x      | SeattleSeq, LOVDplus                                | GoNL, 1000 Genomes  |

MAF, minor allele frequency; GoNL, genomes of The Netherlands.

**Table S2. Primers and amplification conditions for resequencing.**

| Dideoxy-sequencing primers to confirm variants in the craniosynostosis cohort <sup>a</sup> |                             |                                 |                                |                   |
|--------------------------------------------------------------------------------------------|-----------------------------|---------------------------------|--------------------------------|-------------------|
| Variant                                                                                    | Primers                     | Primer sequence 5'→3'           |                                | Product size (bp) |
|                                                                                            |                             | Forward                         | Reverse                        |                   |
| c.226A>C                                                                                   | 4F/4R                       | TAGTGATGAAGGAAAAGGGGCCTCCTCG    | CTGTTCCCAGTCCCACAGGGTAGTCAG    | 314               |
| c.318C>T                                                                                   |                             |                                 |                                |                   |
| c.469C>T                                                                                   | 5F/5R                       | ACCACGTATGGTGTAACCTCTGGTGCCTCAC | CTTGGCCTGGCAGGCTTCAGGATGAC     | 436               |
| c.653+5G>A                                                                                 | 8F/8R                       | CATGAGCCTTAGACTTCTCTGCTTCCTTAC  | ATCACACACATACCCAGAAAGGGGCTGCA  | 240               |
| c.677A>G                                                                                   | 9F/9R                       | GAGAGAGGCCACCTGACTGAGGCAAG      | CAGTCCTCACTTCTCAATAGGACCCTA    | 335               |
| c.1487C>T                                                                                  | 16F/16R                     | CATAGACAAAGAACCGGCGCTGCAAACCTG  | GACACTAGAGGCAAATACCACTCTACTCAG | 223               |
| Dideoxy-sequencing primers for <i>CDC45</i> in the MGS cohort <sup>b</sup>                 |                             |                                 |                                |                   |
| Exon(s)                                                                                    | Forward                     |                                 | Reverse                        | Product size (bp) |
| 1-2                                                                                        | GATTTGGCGGGAGTCTTG          |                                 | ACGCAGCACCCCTCACCTC            | 382               |
| 3                                                                                          | TCTTTTCAAGGTAATGCTAATGTC    |                                 | TGGAAATAGAATGCTGTGTC AAG       | 230               |
| 4                                                                                          | AGTGATGAAGGAAAAGGGGC        |                                 | CCAAGAACACCAGGTGAGAC           | 274               |
| 5                                                                                          | TCAGCTTATTAGGAAATGATAAGATTC |                                 | CCACTGCCCTCAGTACACC            | 343               |
| 6                                                                                          | CTGGGCCTACTGACTTCTGC        |                                 | TCACTTCAAGCTAGAATAACCTTTC      | 519               |
| 7                                                                                          | TTTTCCAAAATATTTGGCTTCC      |                                 | AGGACTGACCCCTGGAG              | 174               |
| 8                                                                                          | TCAAGTCCAGTCTGGCTGC         |                                 | TTATGTGGCACTGACCAAGG           | 201               |
| 9                                                                                          | CCTCATTGAGCCCAGGTG          |                                 | GTGGCTATGGTCAGGCTGTG           | 179               |
| 10                                                                                         | CTGCCTGGTAAGAGCTGGAG        |                                 | ACCCACAGAGGGTGACAAAG           | 257               |
| 11-12                                                                                      | CCACCTGCTGGAGTTACGAG        |                                 | CCCTTCACTTTAATGAACCTGG         | 610               |
| 13                                                                                         | GCAGTGAGAGCTTGCCAC          |                                 | CCCCTAACTGACCTCCCTG            | 293               |
| 14-15                                                                                      | CAAGCAAACCTATTTGTGACTTTGG   |                                 | GGAGCTCTCCAAGCACCTG            | 437               |
| 16-17                                                                                      | CTCTGAGTGTTGAGCTGGGG        |                                 | AACTTGCTTGGTTCCAGGG            | 506               |
| 18                                                                                         | TTCTGTGCCCTGTCTTGTG         |                                 | AGCAGGGCATCAGGGTC              | 199               |

| Primers for Fluidigm resequencing in the craniosynostosis cohort <sup>e</sup> |                                                     |                                                         |                                           |
|-------------------------------------------------------------------------------|-----------------------------------------------------|---------------------------------------------------------|-------------------------------------------|
| ID                                                                            | Forward                                             | Reverse                                                 | Length (bp, excluding universal adaptors) |
| CDC45_1                                                                       | ACACTGACGACATGGTTCTACAAGTCTTGACCGCCGCC              | TACGGTAGCAGAGACTTGGTCTCCCCTCATCCCTTCCCA                 | 173                                       |
| CDC45_2                                                                       | ACACTGACGACATGGTTCTACACCTCGGACGTGGATGCT             | TACGGTAGCAGAGACTTGGTCTCTCACTTGCTGTTACCTCCT              | 186                                       |
| CDC45_3                                                                       | ACACTGACGACATGGTTCTACAGTCCAGAGCCAGGTGACG            | TACGGTAGCAGAGACTTGGTCTCTGAAGGATCTGCACGCAC               | 210                                       |
| CDC45_4                                                                       | ACACTGACGACATGGTTCTACAAGATAGGCTTTGAAAACACTCTCTCT    | TACGGTAGCAGAGACTTGGTCTTGCTGTGTCAAGAAATTACAATTGAGTA      | 186                                       |
| CDC45_5                                                                       | ACACTGACGACATGGTTCTACAATGAAGACACTATATTCTTTGTGTGTGAC | TACGGTAGCAGAGACTTGGTCTTAGTCAGACACACACCTTACCAAG          | 167                                       |
| CDC45_6                                                                       | ACACTGACGACATGGTTCTACATCAGAGGCTTAGTGATGAAGGAAAA     | TACGGTAGCAGAGACTTGGTCTATTGACGACATTGACTGGCCTAT           | 192                                       |
| CDC45_7                                                                       | ACACTGACGACATGGTTCTACACCGTAGAAAGAGGAGAGGCTTAATT     | TACGGTAGCAGAGACTTGGTCTGATAGCTGTGAGAGACCCAACT            | 215                                       |
| CDC45_8                                                                       | ACACTGACGACATGGTTCTACAGGCCTACTGACTTCTGCCAAA         | TACGGTAGCAGAGACTTGGTCTGGCTTCTGGTGTGGGAG                 | 193                                       |
| CDC45_9                                                                       | ACACTGACGACATGGTTCTACAGTGCCACCCATACCTCTGAC          | TACGGTAGCAGAGACTTGGTCTCCATGGTCTTAATGGATGGCA             | 188                                       |
| CDC45_10                                                                      | ACACTGACGACATGGTTCTACACTTCTGTACTGCTACTTCTCTGTT      | TACGGTAGCAGAGACTTGGTCTACATTTGAGGACACTGACCCC             | 164                                       |
| CDC45_11                                                                      | ACACTGACGACATGGTTCTACAGCCTTAGACTTCTCTGCTTCTCTT      | TACGGTAGCAGAGACTTGGTCTGTGGCACTGACCAAGGCA                | 145                                       |
| CDC45_12                                                                      | ACACTGACGACATGGTTCTACACATCATCTCACTCCATCCCCC         | TACGGTAGCAGAGACTTGGTCTGCTATGGTCAGGCTGTGCA               | 200                                       |
| CDC45_13                                                                      | ACACTGACGACATGGTTCTACATTCCCGCCACAACCACC             | TACGGTAGCAGAGACTTGGTCTCACCTGCTTCCCTCTGG                 | 191                                       |
| CDC45_14                                                                      | ACACTGACGACATGGTTCTACTGCTGGTAAGAGCTGGAG             | TACGGTAGCAGAGACTTGGTCTGAGTGTGTTCTCCTCATCCTCG            | 141                                       |
| CDC45_15                                                                      | ACACTGACGACATGGTTCTACATTCAAGCTGTGGTCTGTGCA          | TACGGTAGCAGAGACTTGGTCTTCTGGGATCTAGGGCAAGGA              | 194                                       |
| CDC45_16                                                                      | ACACTGACGACATGGTTCTACAGCTTGCATGCTCCTTGACTG          | TACGGTAGCAGAGACTTGGTCTCTCCTGGAGCCGCTTCTG                | 144                                       |
| CDC45_17                                                                      | ACACTGACGACATGGTTCTACAGTCGGTGTGTGGTGACCTC           | TACGGTAGCAGAGACTTGGTCTCTTAAATGAACCTGGATGTAATGAAGATAAATC | 200                                       |
| CDC45_18                                                                      | ACACTGACGACATGGTTCTACAGCTGTGTTGCTCCCATGAC           | TACGGTAGCAGAGACTTGGTCTCAAACCCACAGCCCTCCT                | 207                                       |
| CDC45_19                                                                      | ACACTGACGACATGGTTCTACAACTCGCCAAGAAGCAGCT            | TACGGTAGCAGAGACTTGGTCTAGACGAAGCCACTGGTGC                | 161                                       |
| CDC45_20                                                                      | ACACTGACGACATGGTTCTACATTACCAAGAGTTCCTGACAAGCA       | TACGGTAGCAGAGACTTGGTCTAATGGTCTGCTGGGTGGC                | 127                                       |
| CDC45_21                                                                      | ACACTGACGACATGGTTCTACACAGTGGCTTCGTCTGACCAT          | TACGGTAGCAGAGACTTGGTCTGGCCAGCATCTAACTCCCC               | 201                                       |
| CDC45_22                                                                      | ACACTGACGACATGGTTCTACTCTGAGTGTGAGCTGGGG             | TACGGTAGCAGAGACTTGGTCTGGACGAGTGAAGCTGCTC                | 200                                       |
| CDC45_23                                                                      | ACACTGACGACATGGTTCTACACATGTCTGTGTGTCAGCAGC          | TACGGTAGCAGAGACTTGGTCTCCAGCCATGCCAATTGC                 | 187                                       |
| CDC45_24                                                                      | ACACTGACGACATGGTTCTACAGTGAGCAGCTTCCACTCGT           | TACGGTAGCAGAGACTTGGTCTCTTCTCAAACGCCCTCCCAA              | 196                                       |
| CDC45_25                                                                      | ACACTGACGACATGGTTCTACATCCCTTCTCACGGCTGTTTTT         | TACGGTAGCAGAGACTTGGTCTCCAAGTAGAAGCCTCCGTTGA             | 201                                       |



| MLPA Primer Sequences <sup>d</sup> |                                                                   |
|------------------------------------|-------------------------------------------------------------------|
| ID                                 | Sequence                                                          |
| CDC45-EX4-5                        | GGGTTCCCTAAGGGTTGGAAGCCAGTCAATGTCGTCATGTATA                       |
| CDC45-EX4-3                        | CAACGATACCCAGGTACTTTTTGTGCTAGATTGGATCTTGCTGGCAC                   |
| CDC45-EX3-5                        | GGGTTCCCTAAGGGTTGGAAGATAGGCTTTGAAAACACTCTCTCCAGGC                 |
| CDC45-EX3-3                        | CTTGTTCAGTGTGACCACGTGCAATATACGTCTAGATTGGATCTTGCTGGCAC             |
| CDC45-EX5B-5                       | GGGTTCCCTAAGGGTTGGAAGCGCACACGGTTAGAAGAGGTGAGTTGGGTCTCT            |
| CDC45-EX5B-3                       | CACAGCTATCCCAGAGGAACCTGCACTCCAGAGGCTAGATTGGATCTTGCTGGCAC          |
| CDC45-EX7-5                        | GGGTTCCCTAAGGGTTGGAAGTACGAGCAGTATGAATATCATGGGACATCGGTAAGTAT       |
| CDC45-EX7-3                        | GAATAGGTGGAACCTCACTATAAAGTTCTGACTCCAGGGGCTAGATTGGATCTTGCTGGCAC    |
| CDC45-EX5A-5                       | GGGTTCCCTAAGGGTTGGAAGATGATGACCTTGAAGTTCCCGCTATGAAGACATCTTCAG      |
| CDC45-EX5A-3                       | GGATGAAGAGGAGGATGAAGAGCATTACAGAAATGACAGTGCTAGATTGGATCTTGCTGGCAC   |
| CDC45-EX6-5                        | GGGTTCCCTAAGGGTTGGAAGCTGTGGGGATAAATTCCTGGTGCATTTGCTCCACCTTTTGT    |
| CDC45-EX6-3                        | CTCTTTGTCCCTGTATCAGGAGATAGTGGAGCAAACCATGCGGCTAGATTGGATCTTGCTGGCAC |

<sup>a</sup>DNA was extracted from either venous blood collected into EDTA, lymphoblastoid cell lines or cultured fibroblasts established from skin biopsies obtained from the scalp incision at the time of surgical intervention. All DNA was extracted using the Nucleon Blood and Cell Culture (BACC) DNA extraction kit (Gen-Probe Inc.) according to the manufacturer's instructions. PCR amplification of DNA was performed in a volume of 20 µl, containing 15 mM TrisHCl (pH 8.0), 50 mM KCl, 2.5 mM MgCl<sub>2</sub>, 100 µM each dNTP, 0.4 µM primers, and 0.75 units of FastStart Taq DNA Polymerase (Roche). Cycling conditions comprised a 5 min initial denaturation step at 94°C, followed by 35 cycles of 94°C for 30 s, annealing at 63°C for 30 s and extension at 72°C for 30 s, with a final extension at 72°C for 7 min. For dideoxy-sequencing, amplified PCR products were treated with *ExoI* (NEB) and shrimp alkaline phosphatase (FastAP; Thermo Scientific) to remove PCR primers and dNTPs respectively, by incubating at 37°C for 30 min, followed by 85°C for 15 mins to denature the enzymes. Sequencing was then carried out using the BigDye Terminator v3.1 cycle sequencer system (Applied Biosystems).

<sup>b</sup>PCR amplification of DNA was performed in a volume of 10 µl, using ReddyMix PCR master mix with 1.5 mM MgCl<sub>2</sub> (Thermo Scientific), 0.5 µM primers and 10 ng DNA. Cycling conditions employed a touchdown approach and were as follows: 5 min initial denaturation step at 95°C, then 3 cycles of 94°C for 30 s, 65°C for 30 s, 72°C for 45 s, then 3 cycles of 94°C for 30 s, 62°C for 30 s, 72°C for 45 s, then 3 cycles of 94°C for 30 s, 59°C for 30 s, 72°C for 45 s with a final 35 cycles of 94°C for 30 s, 56°C for 30 s, 72°C for 45 s, then a final extension of 72°C for 10 min. Dideoxy-sequencing was performed as in <sup>a</sup>.

<sup>c</sup>Primer pairs were designed to amplify 25 target regions of approximately 200 bp, covering all 19 exons and intron/exon boundaries for use with the Access Array™ IFC system (Fluidigm). Universal CS1 and CS2 adaptor sequences were included on the 5' ends of all target-specific forward and reverse primers, respectively. Primers were multiplexed into pools of 4-5 optimised pairs, with a final concentration of 1 µM per primer. Amplicon tagging, thermal cycling using the Biomark HD™ system (Fluidigm) and product harvesting were performed following the manufacturer's instructions. Ion PGM™ sequence-specific adaptors and sample indexes were attached to each amplicon pool for DNA extracted from 48 individual craniosynostosis patients using a DNA Engine Dyad® Peltier thermal cycler (Bio-Rad). Indexed PCR products were pooled, purified with AMPure XP beads (Beckman Coulter Ltd.) and quantified using an Agilent High Sensitivity DNA Kit with the 2100 Bioanalyzer (Agilent Technologies, Inc) or

the 2200 TapeStation (Agilent Technologies) with a High Sensitivity D1000 ScreenTape. In total, 467 patient samples were processed for downstream sequencing applications. Pooled and indexed PCR products were sequenced using the Ion PGM™ System (Life Technologies Ltd.). Pooled libraries were diluted to a final concentration of 10 pM and emulsion PCR and enrichment were performed with the Ion PGM™ Template OT2 200 Kit (Life Technologies Ltd.) according to the manufacturer's instructions. Enriched target regions were sequenced with the Ion PGM™ Sequencing 200 Kit v2 for 125 cycles, using an Ion 318 chip.

Underperforming amplicons (CDC45\_2, CDC45\_3 and CDC45\_24) were re-sequenced independently. PCR products were amplified from 40 ng DNA with Q5® Hot Start High Fidelity polymerase (NEB) in the recommended standard reaction mixture, with the inclusion of Q5 High GC Enhancer. Cycling conditions were denaturation at 98°C for 30 s, followed by 35 cycles of 98°C for 10 s, 60°C for 30 s and 72°C for 30 s, followed by a final extension at 72°C for 2 min. Amplification products were diluted 100-fold and used in a second PCR reaction to incorporate Ion PGM™ sequence-specific adaptors and sample indexes as above, for 9 cycles. Pooled samples were purified and sequenced for 100 cycles as described above, using an Ion 314 chip. Sequence read alignment and variant analysis were performed using the Ion Torrent platform-specific software v4.2.1. In total 361 samples fulfilled minimum coverage parameters (x10 reads) for all amplicons.

<sup>d</sup>The MLPA reactions were performed according to a protocol based on the methods described previously.<sup>5,6</sup> Products were separated by capillary electrophoresis on the ABI 3130 (Applied Biosystems) and data analyzed using GeneMarker (SoftGenetics Inc). Threshold ratios for deletion and duplication were set at <0.75 and >1.3, respectively. The colored primer sequences are universal for the MLPA procedure.

**Table S3. Primer sequences used for cDNA analysis of *CDC45*.**

| Target Primers | Primer sequence 5'→3'       |                             | Product size (bp)                                |
|----------------|-----------------------------|-----------------------------|--------------------------------------------------|
|                | Forward                     | Reverse                     |                                                  |
| Exon 1-3       | TCCGATTTCCGCAAAGAGTTCTACG   | CAGCGTATATTGCACGTGGTCACA    | 138                                              |
| Exon 3-4       | GGTGGCAAGAACTTGAAACTG       | ACATTGACGACATTGACTGGCCTAT   | 166                                              |
| Exon 3-5       | GGTGGCAAGAACTTGAAACTG       | ATGTCTTCATAGGCGGGAAC        | 238/100 if exon 4 skipped                        |
| Exon 5-6       | GTTCCCGCCTATGAAGACAT        | CTCCTCCGCATGGTTTGCTC        | 137                                              |
| Exon 2F-5R     | GACGTGGATGCTCTGTGTGC        | GCTTCTCAGAAGGCTCTGACC       | 394/301 if exon 3 skipped /256 if exon 4 skipped |
| Exon 2_3F-5_4R | AGATCCTTCAGGCCTTGTTCC       | TAATTTGATCTGGGTATCGTTGTATAC | 251                                              |
| Exon 2_3F-5_3R | AGATCCTTCAGGCCTTGTTCC       | TAATTTGATCTGTTCTTTATGCTCAAG | 113                                              |
| <i>GAPDH</i>   | GGACTCCACGACGTACTCAGCGCCAGC | GTGGATATTGTTGCCATCAATGACC   | 213                                              |

**Table S4. *In silico* prediction of mutation effects on canonical splice sites.**

| Patient(s)  | Mutation             | Allele  | Sequence  | MAXENT Score | Sum Difference | Sum Variation | Significance Threshold | Significant <sup>a</sup>            |
|-------------|----------------------|---------|-----------|--------------|----------------|---------------|------------------------|-------------------------------------|
| P3          | c.653+5G>A           | G (WT)  | tcagtaagg | 8.61         | 5.95           | -69%          | -30%                   | Yes – 5' donor site lost            |
|             |                      | A (MUT) | tcagtaaag | 2.66         |                |               |                        |                                     |
| P9-1 & P9-2 | c.203A>G, p.Gln68Arg | A (WT)  | caggtattg | 8.35         | 3.48           | -42%          | -30%                   | Yes – 5' donor site lost            |
|             |                      | G (MUT) | cgggtattg | 4.87         |                |               |                        |                                     |
| P10         | c.1440+14C>T         | C (WT)  | caggcgggt | 0.81         | -7.75          | +1157%        | +30%                   | Yes – cryptic 5' donor site created |
|             |                      | T (MUT) | caggtgggt | 8.56         |                |               |                        |                                     |

<sup>a</sup>Significance based on thresholds applied by prediction software, Alamut Batch (Interactive Biosciences Inc) and Human Splicing Finder.<sup>7</sup>

**Table S5. *In silico* splicing predictions for synonymous mutations in *CDC45*.**

| Patient(s)  | Mutation           | Motif affected                              | Predicted Consequence |
|-------------|--------------------|---------------------------------------------|-----------------------|
| P1          | c.318C>T, p. V106V | Multiple potential silencing motifs created | Skipping of exon 4    |
| P9-1 & P9-2 | c.333C>T, p.N111N  | SRp40 exonic splice enhancer motif lost     | Skipping of exon 4    |

Predictions calculated using Human Splicing Finder.<sup>7</sup>

## References

1. Li, H., and Durbin, R. (2009). Fast and accurate short read alignment with Burrows-Wheeler transform. *Bioinformatics* 25, 1754-1760.
2. Lunter, G., and Goodson, M. (2011). Stampy: a statistical algorithm for sensitive and fast mapping of Illumina sequence reads. *Genome Res.* 21, 936-939.
3. Rimmer, A., Phan, H., Mathieson, I., Iqbal, Z., Twigg, S.R., Consortium, W.G.S., Wilkie, A.O., McVean, G., and Lunter, G. (2014). Integrating mapping-, assembly- and haplotype-based approaches for calling variants in clinical sequencing applications. *Nat. Genet.* 46, 912-918.
4. Wang, K., Li, M., and Hakonarson, H. (2010). ANNOVAR: functional annotation of genetic variants from high-throughput sequencing data. *Nucleic Acids Res.* 38, e164.
5. Schouten, J.P., McElgunn, C.J., Waaijer, R., Zwijnenburg, D., Diepvens, F., and Pals, G. (2002). Relative quantification of 40 nucleic acid sequences by multiplex ligation-dependent probe amplification. *Nucleic. Acids. Res.* 30, e57.
6. White, S.J., Vink, G.R., Kriek, M., Wuyts, W., Schouten, J., Bakker, B., Breuning, M.H., and den Dunnen, J.T. (2004). Two-color multiplex ligation-dependent probe amplification: detecting genomic rearrangements in hereditary multiple exostoses. *Hum. Mutat.* 24, 86-92.
7. Desmet, F.O., Hamroun, D., Lalande, M., Collod-Beroud, G., Claustres, M., and Beroud, C. (2009). Human Splicing Finder: an online bioinformatics tool to predict splicing signals. *Nucleic Acids Res.* 37, e67.
